# Supplementary material for: Electrochemical synthesis of titanium nitride nanoparticles onto titanium foil for electrochemical supercapacitors with ultrafast charge/discharge
Source: Royal Society of Chemistry journal article supplement (doi:10.1039/d0se00049c), 2020-01-01
Supplement: d0se00049c1.pdf [file d0se00049c1.pdf]

**Supporting Information**

**Electrochemical Synthesis of Titanium Nitride Nanoparticles onto  
Titanium Foil for Electrochemical Supercapacitors with Ultrafast  
Charge/Discharge**

Sajid Ali Ansari<sup>1</sup>, Nazmul Abedin Khan<sup>2</sup>, Zubair Hasan<sup>2</sup>, A. A. Shaikh<sup>3</sup>, Farhana K. Ferdousi<sup>3</sup>,  
Hasi Rani Barai<sup>4,\*</sup>, Nasrin Siraj Lopa<sup>5</sup>, and Md. Mahbubur Rahman<sup>5,\*</sup>

<sup>1</sup>*Department of Physics, College of Science, King Faisal University, Al-Ahsa 31982, Saudi Arabia.*

<sup>2</sup>*Department of Mathematical and Physical Sciences, East West University, Dhaka 1212, Bangladesh*

<sup>3</sup>*Department of Chemistry, University of Dhaka, Dhaka-1000, Bangladesh*

<sup>4</sup>*Department of Mechanical Engineering, Yeungnam University, Gyeongsan 712-749, Korea*

<sup>5</sup>*Department of Energy and Materials, Konkuk University, Chungju 27478, Korea*

\*To whom correspondence should be addressed. E-mail: hrbarai@ynu.ac.kr (H. R. Barai);  
mahbub1982@kku.ac.kr (M. M. Rahman)

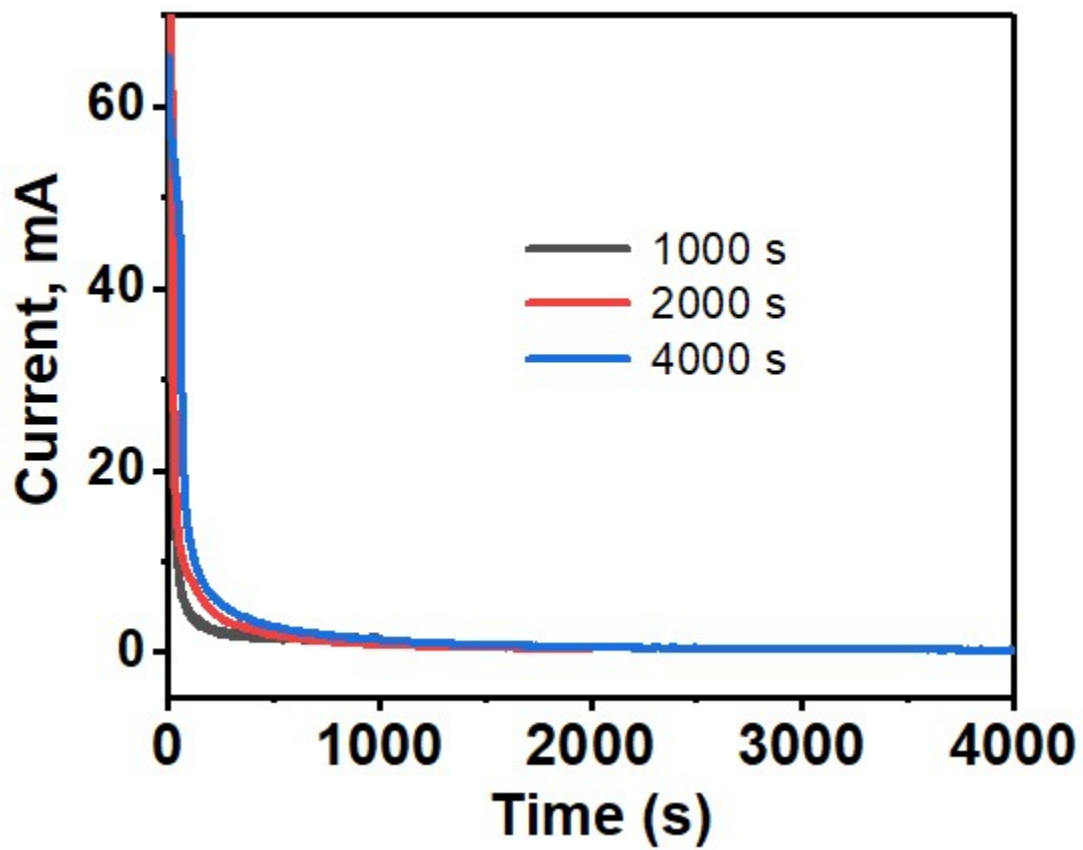

**Fig. S1:** Current (i)-time(t) plots for the synthesis of TiN nanoparticles onto Ti foil for 1000, 2000, and 4000s.

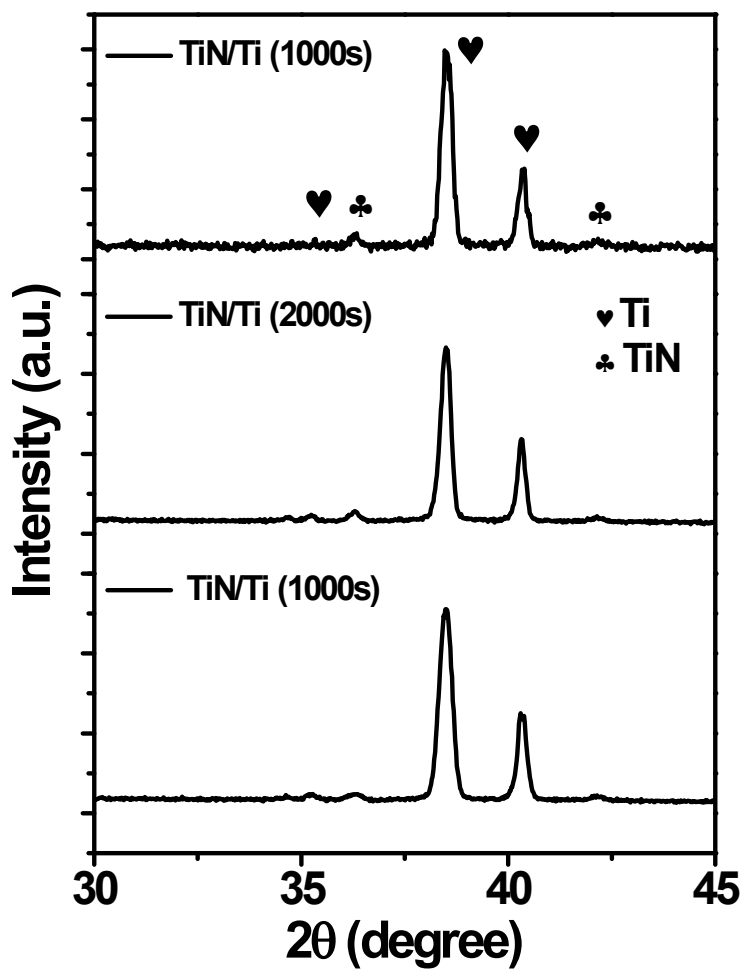

**Fig S2.** XRD patterns of TiN/Ti electrodes with the electrolysis time of 1000, 2000, and 4000 s for the synthesis of TiN.

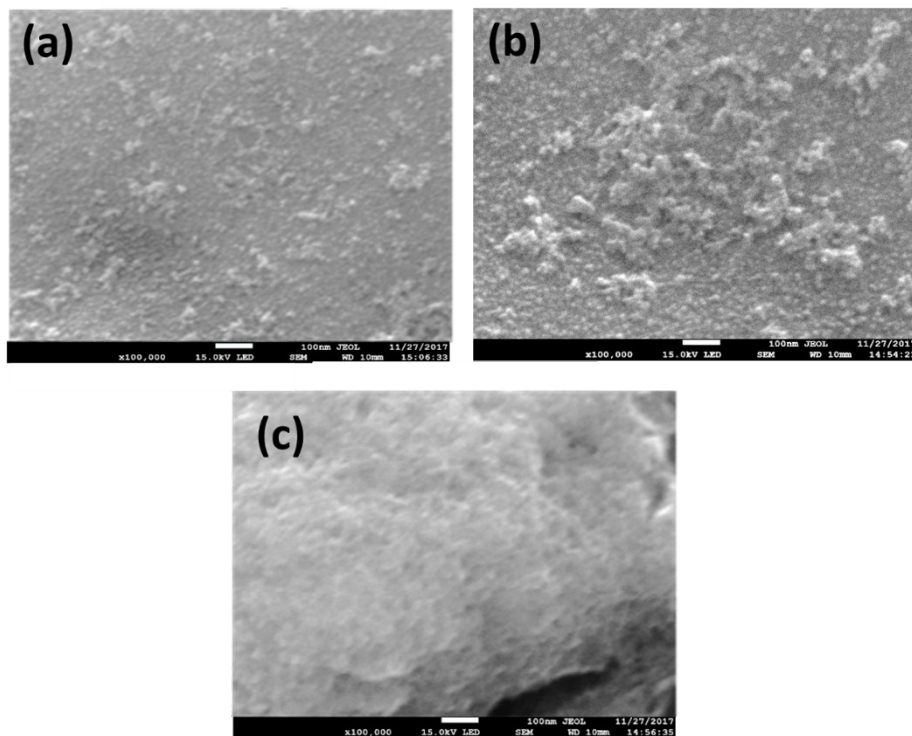

**Fig S3.** FE-SEM images of TiN/Ti electrodes with the electrolysis time of 1000, 2000, and 4000s for the synthesis of TiN.

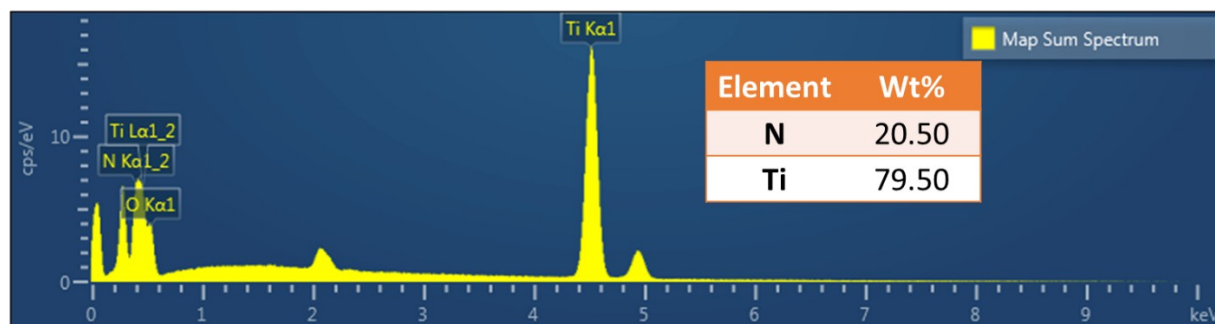

**Fig. S4:** EDS spectra of the TiN/Ti electrode (electrosynthesis time 3000s). Inset shows the elemental wt (%) of Ti and N in the TiN/Ti electrode.

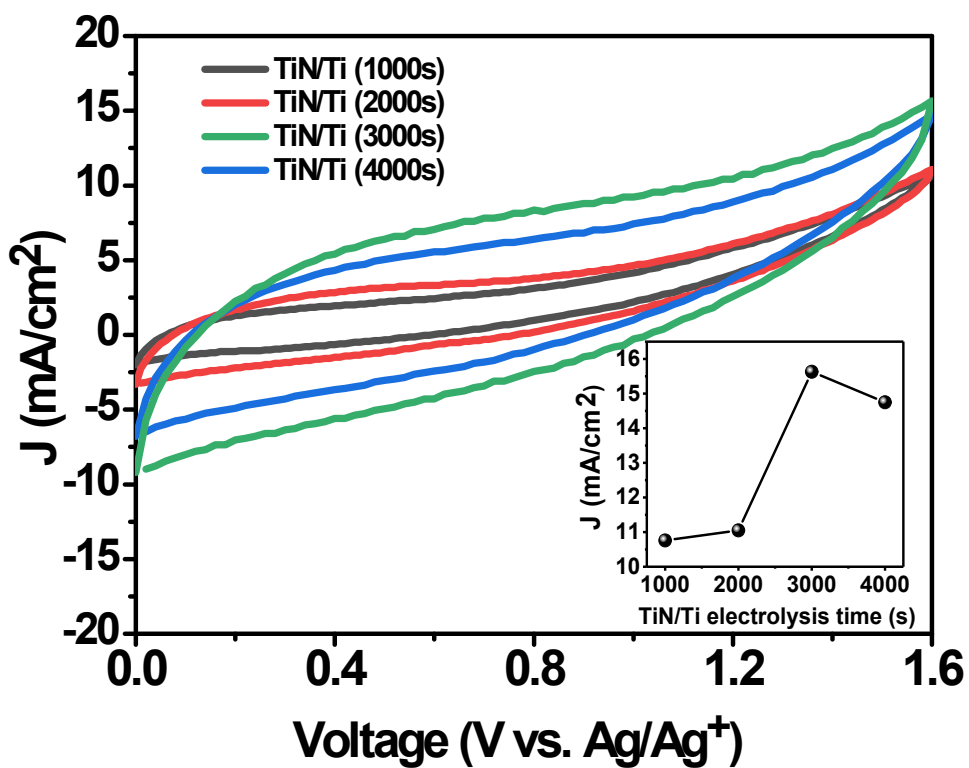

**Fig. S5:** CV of the TiN/Ti electrode in three electrode system with varying electrolysis time for the synthesis of TiN nanoparticles in LiClO<sub>4</sub> (1 M) electrolyte at a scan rate of 100 mV/s (Inset shows the plots of discharge current density vs. TiN/Ti electrodes with varying electrolysis time for the synthesis of TiN nanoparticles).

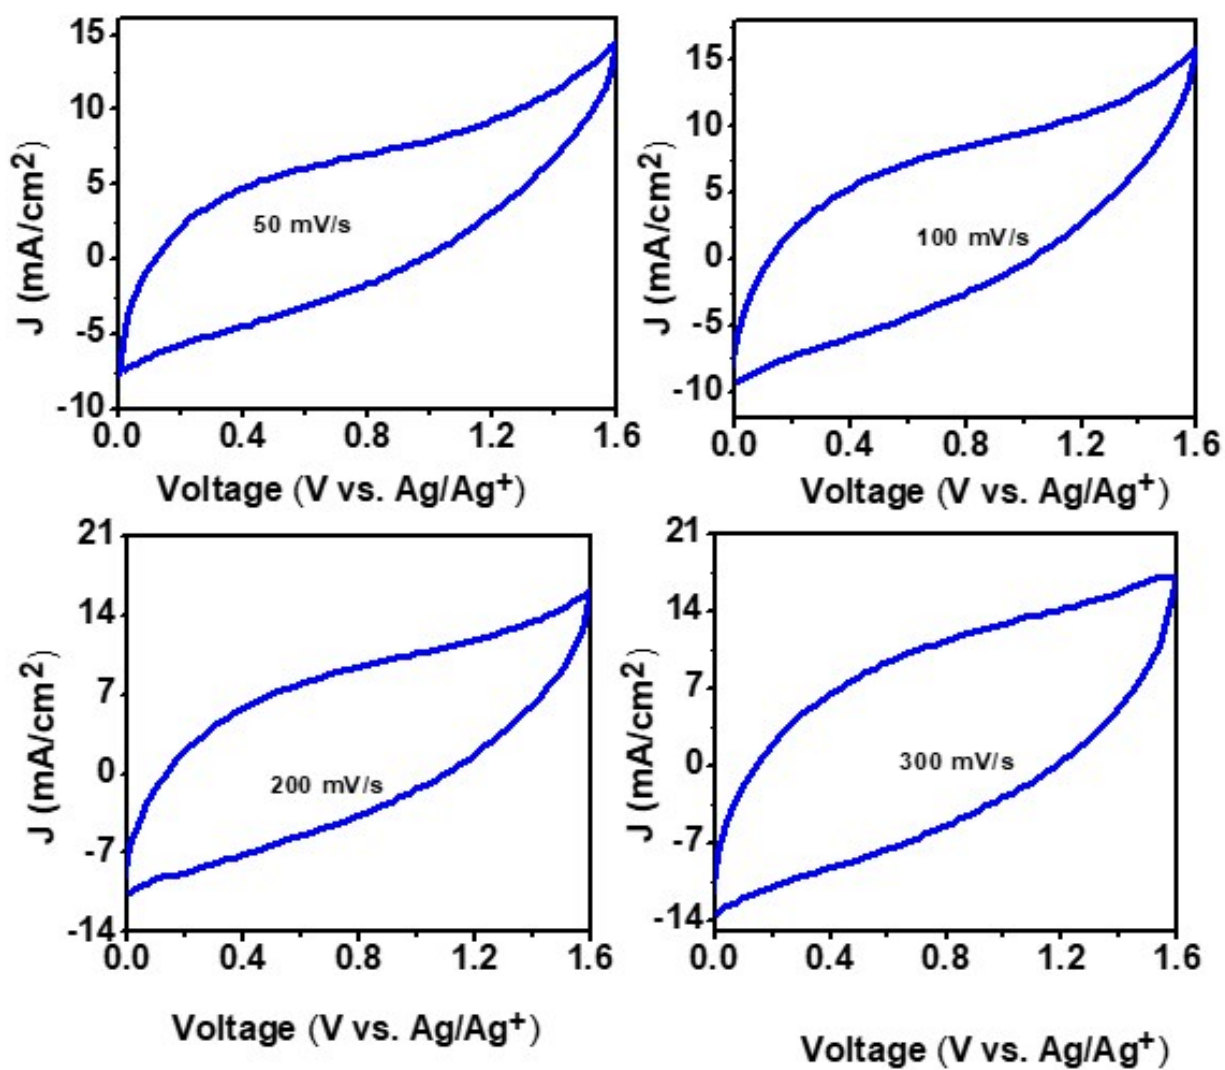

**Fig. S6:** CVs of the optimized TiN/Ti electrode in a three electrode system at a scan rate of 50, 100, 200, and 300 mV/s in an electrolyte solution of LiClO<sub>4</sub> (1M).

### Calculation of specific capacitance ( $C_s$ ):

From the CV plots, the  $C_s$  of the TiN/Ti electrode was calculated according to the following equation (S1).

$$C_s = \frac{\int_{V_1}^{V_2} i(V) dV}{2 \times \nu \times (V_2 - V_1) \times A} \quad (S1)$$

where,  $A$ ,  $\int_{V_2}^{V_1} i(V) dV$ ,  $V_2 - V_1$ , and  $\nu$  are the area of the electrode, total voltammetric charge, the width of the voltage, and scan rate, respectively.

From the CD plots, the  $C_s$  of the TiN/Ti electrode was calculated according to the following equation (S2).

$$C_s = \frac{I \times \Delta t}{A \times (V_2 - V_1)} \quad (S2)$$

where,  $I$  is the applied current and  $\Delta t$  is the discharge time.



**Calculation of energy density ( $E_d$ ) and power density ( $P_d$ ):**

The  $E_d$  and  $P_d$  of the TiN/Ti electrode was calculated according the following equations S3 and S4, respectively.

$$\text{Energy density } (E_D) = 0.5 \times C_s \times \Delta V^2 \quad (\text{S3})$$

$$\text{Power density } (P_D) = E_D \times 3600 / \Delta t \quad (\text{S4})$$

where,  $C_s$  is the areal capacitance,  $\Delta V$  is the operating voltage window, and  $\Delta t$  is the discharge time obtained from the discharge plot after excluding IR drop.

**Calculation of relaxation time constant ( $\tau_0$ ):**

The  $\tau_0$  of the TiN based SSC was calculated based on the following equation S5.

$$\tau_0 = \frac{1}{2\pi f_0} \quad (\text{S5})$$

Here,  $f_0$  is the frequency at angle  $-45^\circ$ .

**Table S1:** Electrochemical performance comparison of reported titanium oxides/nitrides modified electrodes with the current TiN/Ti electrode in a three-electrode system.

| Electrode materials                                           | Method | Applied current/Scan rate           | Specific capacitance, $C_s$ (mF/cm <sup>2</sup> ) | Ref.             |
|---------------------------------------------------------------|--------|-------------------------------------|---------------------------------------------------|------------------|
| K-doped TiO <sub>2</sub> /Ti                                  | CD     | 50 $\mu$ A/cm <sup>2</sup>          | 97.30                                             | S1               |
| 2D TiNS/Ti                                                    | CD     | 50 $\mu$ A/cm <sup>2</sup>          | 4.7                                               | S2               |
| TiN/CNT/Si                                                    | CV     | 1V/s                                | 18.3                                              | S3               |
| 2D- TiO <sub>2</sub> platelet+1D- TiO <sub>2</sub> nanorod/Ti | CD     | 100 $\mu$ A/cm <sup>2</sup>         | 2.64                                              | S4               |
| 2D porous TiO <sub>2</sub> /Ti                                | CV     | 2 mV/s                              | 81.75                                             | S5               |
| TiO <sub>2</sub> nanotube/Ti                                  | CV     | 20 mV/s                             | 0.26                                              | S6               |
| TiN nanotube/Ti                                               | CV     | 20 mV/s                             | 3.14                                              | S6               |
| TiN/Si                                                        | CD     | 1.0 mA/cm <sup>2</sup>              | 27.3                                              | S7               |
| TiN nanoparticle /Ti                                          | CV, CD | 50 mV/s,<br>6.66 mA/cm <sup>2</sup> | 69, 53.66                                         | <b>This work</b> |

Note: TiNS = Titania/titanate nanosheets

## References

S1. H. R. Barai, M. M. Rahman and S. W. Joo, *Electrochim. Acta*, 2017, **253**, 563-571.

S2. H. R. Barai, M. M. Rahman and S. W. Joo, *J. Power Sources*, 2017, **372**, 227-234.

S3. A. Achour, J. B. Ducros, R. L. Porto, M. Boujtita, E. Gautron, L. Le Brizoual, M. A. Djouadi and T. Brousse, *Nano Energy*, 2014, **7**, 104-113.

S4. A. N. Banerjee, V. C. Anitha and S. W. Joo, *Sci. Rep.*, 2017, **7**, 13227.

S5. Q. Wang, M. Li and Z. Wang, *RSC Adv.*, 2019, **9**, 7811-7817.

S6. Y. Xie, Y. Wang and H. Du, *Mater. Sci. Eng. B*, 2013, **178**, 1443-1451.

S7. B. Wei, H. Liang, D. Zhang, Z. Qi, H. Shen and Z. Wang, *Mater. Renew. Sust. Energy*, 2018, **7**, 11.
